# Supplementary material for: Phylogenetic plant community structure along elevation is lineage specific
Source: PubMed Central journal article supplement (PMC3892358; doi:10.1002/ece3.868), 2013-11-08

### Monocot phylogenetic structure

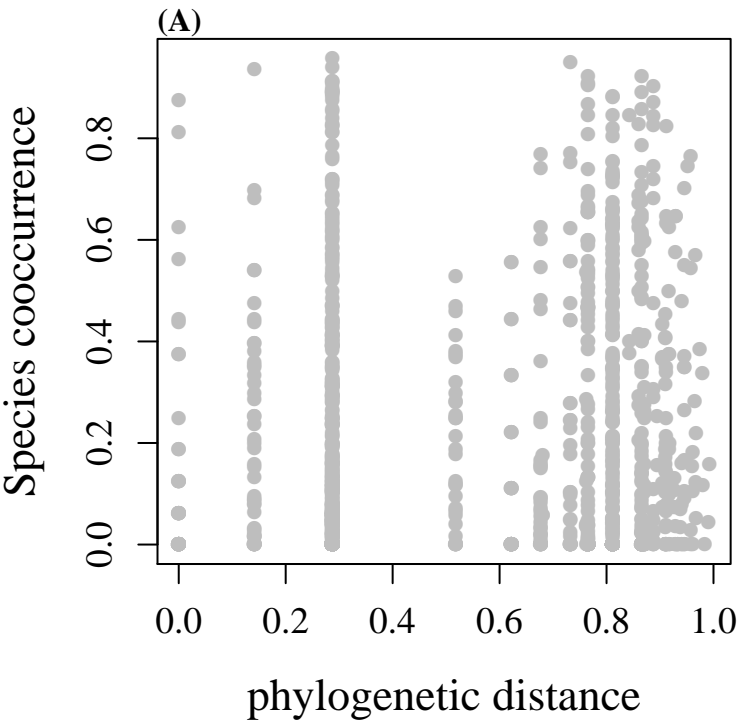

### Eudicot phylogenetic structure

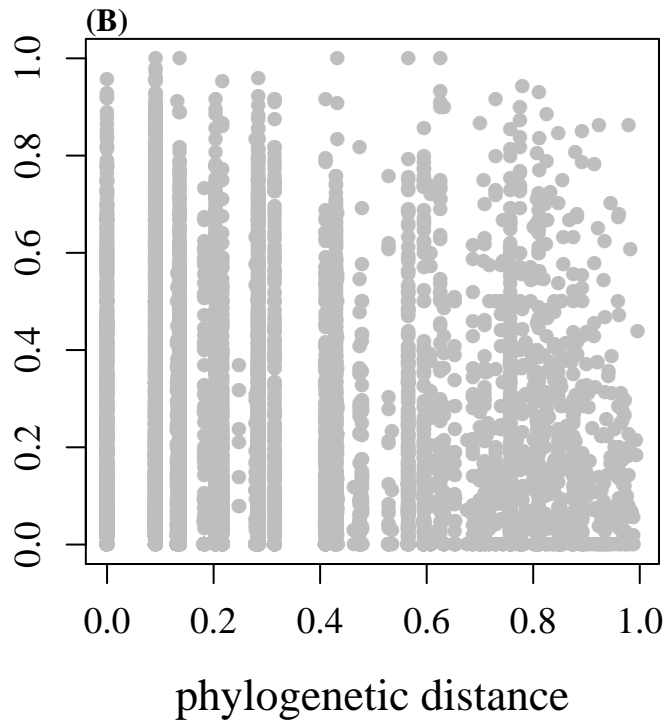

Supplement: ece30003-4925-SD2.pdf [file ece30003-4925-SD2.pdf]
