# Supplementary material for: Phylogenetic plant community structure along elevation is lineage specific
Source: PubMed Central journal article supplement (PMC3892358; doi:10.1002/ece3.868), 2013-11-08

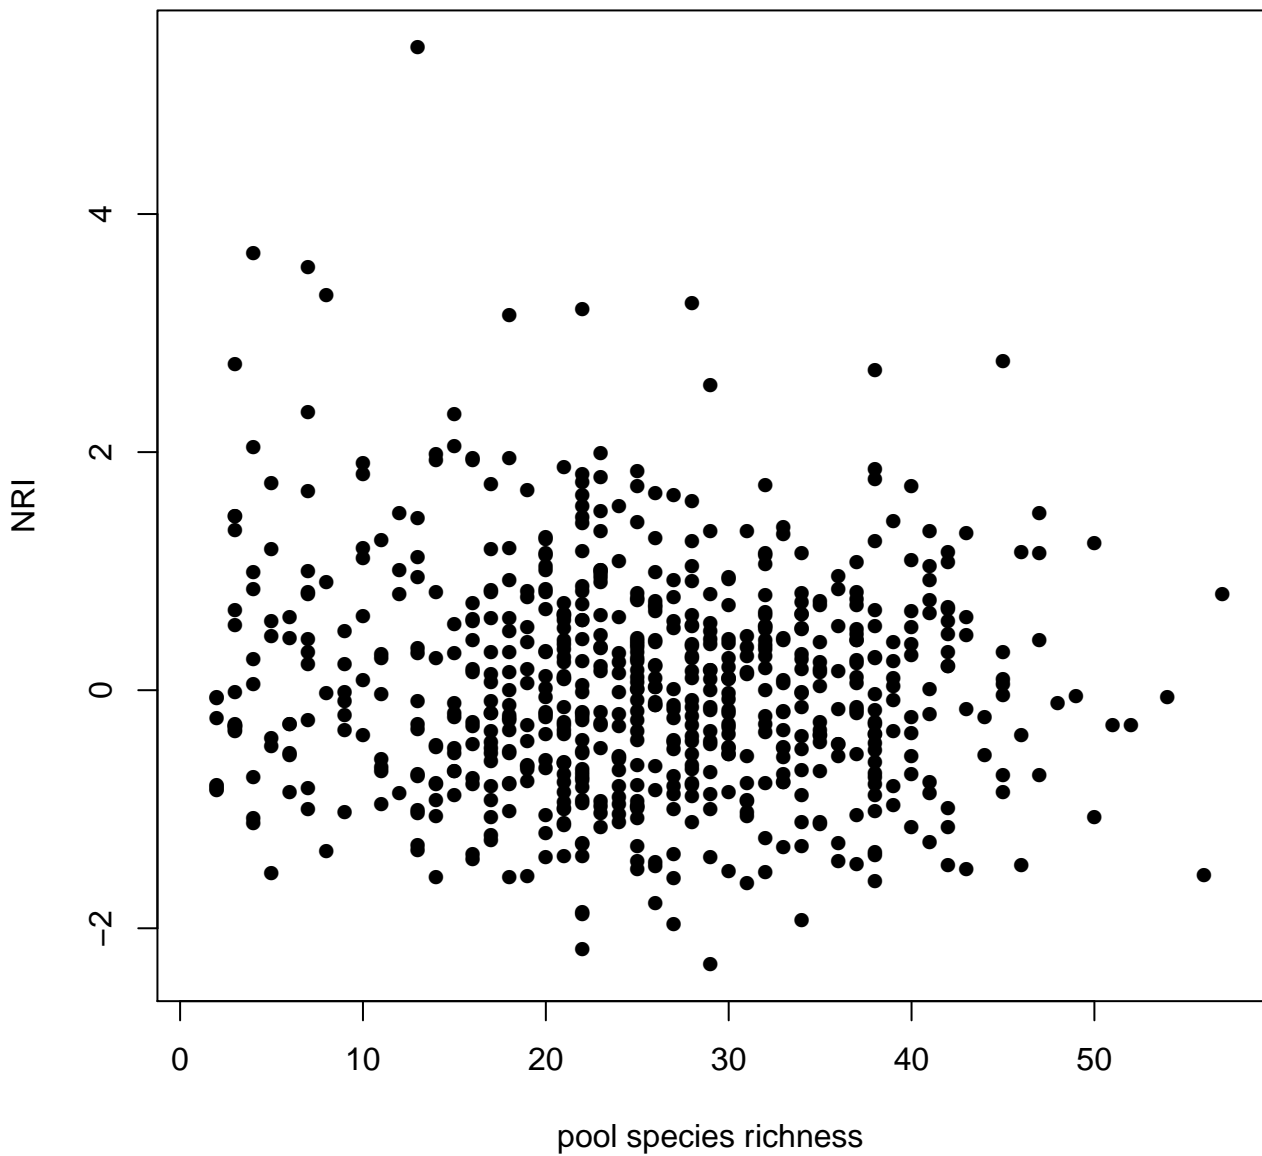

Supplement: ece30003-4925-SD4.pdf [file ece30003-4925-SD4.pdf]
