# Supplementary material for: Phylogenetic plant community structure along elevation is lineage specific
Source: PubMed Central journal article supplement (PMC3892358; doi:10.1002/ece3.868), 2013-11-08
Supplement: ece30003-4925-SD6.pdf [file ece30003-4925-SD6.pdf]

**Table S1 Species, genes and GenBank accession numbers for the additional sequences used in this study.**

| Species                                    | Family       | GenBank Accession #<br>( <i>RbcL</i> ) | Reference                     | GenBank Accession #<br>( <i>MatK</i> ) | Reference                             |
|--------------------------------------------|--------------|----------------------------------------|-------------------------------|----------------------------------------|---------------------------------------|
| <i>Anthriscus sylvestris</i> (L.) Hoffm.   | Apiaceae     |                                        |                               | ASU58547                               | Plunkett <i>et al.</i> 1996           |
| <i>Carum carvi</i> L.                      |              |                                        |                               | CCU58553                               | Plunkett <i>et al.</i> 1996           |
| <i>Daucus carota</i> L.                    |              | AF207689                               | Sato <i>et al.</i> 1997       | DCU58559                               | Plunkett <i>et al.</i> 1996           |
| <i>Laserpitium latifolium</i> L.           |              |                                        |                               | LLU58566                               | Plunkett <i>et al.</i> 1996           |
| <i>Achillea millefolium</i> L.             | Asteraceae   | L13641                                 | Kim <i>et al.</i> 1992        | EU385315                               | Panero & Funk 2008                    |
| <i>Bellis perennis</i> L.                  |              | AY395530                               | Silvertown <i>et al.</i> 2006 | HM850613                               | Schaefer <i>et al.</i> 2011           |
| <i>Carduus defloratus</i> L.               |              |                                        |                               | AY785091                               | Susanna (Unpublished)                 |
| <i>Crepis aurea</i> (L.) Cass.             |              |                                        |                               | EU363564                               | Enke & Gemeinholzer 2008              |
| <i>Crepis vesicaria</i> L.                 |              |                                        |                               | AJ633143                               | Gemeinholzer & Bachmann (Unpublished) |
| <i>Heracleum sphondylium</i> L.            |              | AY395540                               | Silvertown <i>et al.</i> 2006 | FJ395398                               | James <i>et al.</i> (Unpublished)     |
| <i>Hieracium lactucella</i> Wallr.         |              |                                        |                               | AJ633170                               | Fehrer <i>et al.</i> 2007             |
| <i>Homogyne alpine</i> (L.) Cass.          |              |                                        |                               | GU817473                               | Pelser <i>et al.</i> 2010             |
| <i>Hypochaeris radicata</i> L.             |              | AY395542                               | Silvertown <i>et al.</i> 2006 | AJ633231                               | Gemeinholzer & Bachmann (Unpublished) |
| <i>Leontodon autumnalis</i> L.             |              |                                        |                               | AJ633222                               | Gemeinholzer & Bachmann (Unpublished) |
| <i>Leontodon helveticus</i> Mérat          |              |                                        | DQ451703                      | Samuel <i>et al.</i> 2006              |                                       |
| <i>Leontodon hispidus</i> L.               | AY395545     | Silvertown <i>et al.</i> 2006          | AJ633218                      | Gemeinholzer & Bachmann (Unpublished)  |                                       |
| <i>Leucanthemum vulgare</i> Lam.           | AY395546     | Silvertown <i>et al.</i> 2006          | FJ395389                      | James <i>et al.</i> (Unpublished)      |                                       |
| <i>Pimpinella saxifraga</i> L.             | U50229       | Plunkett <i>et al.</i> 1996            | PSU58576                      | Plunkett <i>et al.</i> 1996            |                                       |
| <i>Taraxacum alpinum</i> Hegetschw.        |              |                                        | AJ633161                      | Gemeinholzer & Bachmann (Unpublished)  |                                       |
| <i>Taraxacum officinale</i> (L.) F.H. Wigg | AY395562     | Silvertown <i>et al.</i> 2006          | AJ633157                      | Gemeinholzer & Bachmann (Unpublished)  |                                       |
| <i>Tragopogon pratensis</i> L.             | AY395563     | Silvertown <i>et al.</i> 2006          | FJ395443                      | James <i>et al.</i> (Unpublished)      |                                       |
| <i>Tussilago farfara</i> L.                |              |                                        | EF537951                      | Pelser <i>et al.</i> 2007              |                                       |
| <i>Arabis alpina</i> L.                    | Brassicaceae |                                        | AF144328                      | Koch <i>et al.</i> 2001                |                                       |
| <i>Myosotis alpestris</i> L.               | Boraginaceae |                                        | AY092860                      | Winkworth <i>et al.</i> 2002           |                                       |

|                                        |                 |          |                                        |          |                                            |
|----------------------------------------|-----------------|----------|----------------------------------------|----------|--------------------------------------------|
| <i>Myosotis arvensis</i> Hill.         |                 | EU599847 | Mansion <i>et al.</i><br>(Unpublished) | EU599671 | Mansion <i>et al.</i><br>(Unpublished)     |
| <i>Campanula cochleariifolia</i> Lam.  | Campanulaceae   |          |                                        | JN571946 | Wendling <i>et al.</i><br>2011             |
| <i>Campanula rotundifolia</i> L.       |                 | EU713443 | Haberle <i>et al.</i><br>2009          | JN571959 | Wendling <i>et al.</i><br>2011             |
| <i>Campanula scheuchzeri</i> Vill.     |                 |          |                                        | JN571962 | Wendling <i>et al.</i><br>2011             |
| <i>Phyteuma spicatum</i> L.            |                 | EU643712 | Roquet <i>et al.</i><br>2009           | EU713254 | Haberle <i>et al.</i> 2009                 |
| <i>Cerastium arvense</i> L.            | Caryophyllaceae |          |                                        | FJ404828 | Harbaugh <i>et al.</i><br>(Unpublished)    |
| <i>Cerastium fontanum</i> Baumg.       |                 |          |                                        | FJ404829 | Harbaugh <i>et al.</i><br>(Unpublished)    |
| <i>Gypsophila repens</i> L.            |                 |          |                                        | AY936326 | Fior <i>et al.</i> 2006                    |
| <i>Silene acaulis</i> (L.) Jacq.       |                 |          |                                        | EF547235 | Mower <i>et al.</i> 2007                   |
| <i>Silene vulgaris</i> (Moench) Garcke |                 |          |                                        | EF547245 | Mower <i>et al.</i> 2007                   |
| <i>Carex nigra</i> (L.) Reichard       | Cyperaceae      | GQ469838 | Escudero <i>et al.</i><br>2009         | FN668463 | Sonstebo <i>et al.</i><br>(Unpublished)    |
| <i>Rhododendron ferrugineum</i> L.     | Ericaceae       |          |                                        | AB012741 | Kurashige <i>et al.</i><br>1998            |
| <i>Vaccinium myrtillus</i> L.          |                 | AY145447 | Kron <i>et al.</i> 2002                | AF382810 | Kron <i>et al.</i> 2002                    |
| <i>Vaccinium vitis-idaea</i> L.        |                 | AF419837 | Kron 2001                              | AF382819 | Kron <i>et al.</i> 2002                    |
| <i>Anthyllis vulneraria</i> L.         |                 |          |                                        | AF543845 | Lavin <i>et al.</i> 2003                   |
| <i>Euphorbia cyparissias</i> L.        | Euphorbiaceae   |          |                                        | EU659787 | Kim & Kim<br>(Unpublished)                 |
| <i>Lathyrus pratensis</i> L.           | Fabaceae        | AY395544 | Silvertown <i>et al.</i><br>2006       |          |                                            |
| <i>Lotus corniculatus</i> L.           |                 | U74213   | Doyle <i>et al.</i> 1997               | HM049505 | Gao <i>et al.</i> 2010                     |
| <i>Medicago lupulina</i> L.            |                 | AY395551 | Silvertown <i>et al.</i><br>2006       | HM159569 | Steele <i>et al.</i> 2010                  |
| <i>Onobrychis Montana</i> DC.          |                 |          |                                        | AY386879 | Wojciechowski <i>et al.</i> 2004           |
| <i>Trifolium pratense</i> L.           |                 | AY395564 | Silvertown <i>et al.</i><br>2006       | HQ619811 | Ferri <i>et al.</i><br>(Unpublished)       |
| <i>Trifolium repens</i> L.             |                 |          |                                        | AF522131 | Steele &<br>Wojciechowski<br>(Unpublished) |
| <i>Trifolium thalii</i> Vill.          |                 |          |                                        | AF522136 | Steele &<br>Wojciechowski<br>(Unpublished) |
| <i>Vicia cracca</i> L.                 |                 | AY395566 | Silvertown <i>et al.</i><br>2006       |          |                                            |
| <i>Vicia sativa</i> L.                 |                 |          |                                        | AF522160 | Steele &<br>Wojciechowski<br>(Unpublished) |
| <i>Gentiana acaulis</i> L.             | Gentianaceae    |          |                                        | EF552125 | Haemmerli &<br>Kuepfer<br>(Unpublished)    |
| <i>Gentiana bavarica</i> L.            |                 |          |                                        | EF552079 | Haemmerli &<br>Kuepfer<br>(Unpublished)    |
| <i>Gentiana purpurea</i> L.            |                 |          |                                        | AJ429323 | Bremer <i>et al.</i> 2002                  |
| <i>Gentiana verna</i> L.               |                 | DQ660644 | Simoes <i>et al.</i><br>2007           | EF552112 | Haemmerli &<br>Kuepfer<br>(Unpublished)    |
| <i>Globularia cordifolia</i> L.        | Globulariaceae  | AF124558 | Olmstead <i>et al.</i><br>2001         | AJ429343 | Bremer <i>et al.</i> 2002                  |

|                                                  |                |          |                                     |          |                                   |
|--------------------------------------------------|----------------|----------|-------------------------------------|----------|-----------------------------------|
| <i>Globularia nudicaulis</i> L.                  |                |          |                                     | AY667473 | Rahmanzadeh <i>et al.</i> 2005    |
| <i>Juncus effusus</i> L.                         | Juncaceae      | AY216612 | Drabkova <i>et al.</i> 2006         | AB088803 | Tamura <i>et al.</i> 2004         |
| <i>Luzula campestris</i> (L.) DC.                |                | AY395548 | Silvertown <i>et al.</i> 2006       | HM850953 | Schaefer <i>et al.</i> 2011       |
| <i>Luzula multiflora</i> (Ehrh.) Lej.            |                | AJ419945 | Bremer 2002                         | HM850955 | Schaefer <i>et al.</i> 2011       |
| <i>Ajuga reptans</i> L.                          | Lamiaceae      | U32163   | Wagstaff & Olmstead (Unpublished)   | AY840130 | Braeuchler <i>et al.</i> 2005     |
| <i>Clinopodium vulgare</i> L.                    |                |          |                                     | AY840153 | Braeuchler <i>et al.</i> 2005     |
| <i>Glechoma hederacea</i> L.                     |                | L14292   | Olmstead <i>et al.</i> 1993         | AY840143 | Braeuchler <i>et al.</i> 2005     |
| <i>Origanum vulgare</i> L.                       |                | Z37427   | Kaufmann & Wink 1994                | GU381802 | Braeuchler <i>et al.</i> 2010     |
| <i>Prunella grandiflora</i> (L.) Scholler        |                | Z37431   | Kaufmann & Wink 1994                |          |                                   |
| <i>Prunella vulgaris</i> L.                      |                | AY395556 | Silvertown <i>et al.</i> 2006       | FJ395426 | James <i>et al.</i> (Unpublished) |
| <i>Salvia pratensis</i> L.                       |                | AY570436 | Walker <i>et al.</i> 2004           |          |                                   |
| <i>Stachys officinalis</i> (L.) Trevis           |                | AF502015 | Lindqvist & Albert 2002             |          |                                   |
| <i>Veratrum album</i> L.                         |                | D28168   | Kato & Kawano 1995                  | JF807687 | Kim <i>et al.</i> (Unpublished)   |
| <i>Linum catharticum</i> L.                      | Linaceae       | FJ169570 | McDill <i>et al.</i> 2009           | HM544103 | McDill & Simpson (2011)           |
| <i>Tofieldia calyculata</i> (L.) Wahlenb.        | Melanthiaceae  | AB183410 | Tamura <i>et al.</i> (Unpublished)  | AB541028 | Tamura <i>et al.</i> 2010         |
| <i>Bartsia alpina</i> L.                         | Orobanchaceae  | AF190903 | Olmstead <i>et al.</i> 2001         | AY849600 | Young & dePamphilis 2005          |
| <i>Pedicularis foliosa</i> L.                    |                | AF026836 | Wolfe & dePamphilis 1998            | AF489959 | Leebens-Mack & dePamphilis 2002   |
| <i>Rhinanthus alectorolophus</i> (Scop.) Pollich |                |          |                                     | AM503829 | Li <i>et al.</i> 2008             |
| <i>Linaria alpina</i> (L.) Mill.                 | Plantaginaceae |          |                                     | JF694189 | Fernandez-Mazuecos & Vargas 2011  |
| <i>Plantago lanceolata</i> L.                    |                | L36454   | Olmstead & Reeves 1995              | EU718056 | Vargas <i>et al.</i> 2009         |
| <i>Plantago major</i> L.                         |                |          |                                     | EU749326 | Fazekas <i>et al.</i> 2008        |
| <i>Plantago media</i> L.                         |                |          |                                     | AY667474 | Rahmanzadeh <i>et al.</i> 2005    |
| <i>Veronica chamaedrys</i> L.                    |                |          |                                     | FJ395446 | James <i>et al.</i> (Unpublished) |
| <i>Veronica officinalis</i> L.                   |                | AY034024 | Wagstaff <i>et al.</i> 2002         | HM851037 | Schaefer <i>et al.</i> 2011       |
| <i>Veronica persica</i> Poir.                    |                | AY034022 | Wagstaff <i>et al.</i> 2002         | HM851039 | Schaefer <i>et al.</i> 2011       |
| <i>Agrostis capillaris</i> L.                    | Poaceae        | AY395527 | Silvertown <i>et al.</i> 2006       | FJ231112 | Rotter <i>et al.</i> 2010         |
| <i>Agrostis stolonifera</i> L.                   |                |          |                                     | FJ231114 | Rotter <i>et al.</i> 2010         |
| <i>Anthoxanthum odoratum</i> L.                  |                | AJ746256 | Salamin <i>et al.</i> (Unpublished) | AM234541 | Doering <i>et al.</i> 2007        |
| <i>Arrhenatherum elatius</i> (L.) J. & C. Presl  |                | AJ784823 | Salamin <i>et al.</i> (Unpublished) | AM234543 | Doering <i>et al.</i> 2007        |

|                                                              |              |          |                                       |          |                                    |
|--------------------------------------------------------------|--------------|----------|---------------------------------------|----------|------------------------------------|
| <i>Bromus erectus</i> (Huds.)<br>Fourr.                      |              |          |                                       | AM234570 | Doering <i>et al.</i> 2007         |
| <i>Bromus hordeaceus</i> L.                                  |              | AY395531 | Silvertown <i>et al.</i> 2006         | HM850582 | Schaefer <i>et al.</i> 2011        |
| <i>Brachypodium pinnatum</i> (L.) P. Beauv.                  |              | AM849347 | Christian <i>et al.</i> 2008          | DQ786891 | Soreng <i>et al.</i> (Unpublished) |
| <i>Briza media</i> L.                                        |              |          |                                       | AM234610 | Doering <i>et al.</i> 2007         |
| <i>Cynosurus cristatus</i> L.                                |              | EF125151 | Bouchenak-Khelladi <i>et al.</i> 2009 | DQ786901 | Soreng <i>et al.</i> (Unpublished) |
| <i>Dactylis glomerata</i> L.                                 |              | AY395535 | Silvertown <i>et al.</i> 2006         | AM234595 | Doering <i>et al.</i> 2007         |
| <i>Deschampsia cespitosa</i> (L.) P. Beauv.                  |              | AY691635 | Gardner <i>et al.</i> (Unpublished)   | AM234546 | Doering <i>et al.</i> 2007         |
| <i>Festuca pratensis</i> Huds.                               |              | AY395536 | Silvertown <i>et al.</i> 2006         | HM850535 | Schaefer <i>et al.</i> 2011        |
| <i>Festuca rubra</i> L.                                      |              | AJ746261 | Salamin <i>et al.</i> (Unpublished)   | DQ786911 | Soreng <i>et al.</i> (Unpublished) |
| <i>Helictotrichon versicolor</i> (Vill.) Schult. & Schult. f |              |          |                                       | FM957011 | Winterfeld <i>et al.</i> 2009      |
| <i>Lolium perenne</i> L.                                     |              | AY395547 | Silvertown <i>et al.</i> 2006         | EU434291 | Sungkaew <i>et al.</i> 2009        |
| <i>Nardus stricta</i> L.                                     |              | AY622895 | Duvall <i>et al.</i> (Unpublished)    | AM234573 | Doering <i>et al.</i> 2007         |
| <i>Molinia caerulea</i>                                      |              | AY632367 | Duvall <i>et al.</i> (Unpublished)    | AF164411 | Hilu <i>et al.</i> 1999            |
| <i>Phleum pratense</i> L.                                    |              | AJ784832 | Salamin <i>et al.</i> (Unpublished)   | DQ786932 | Soreng <i>et al.</i> (Unpublished) |
| <i>Poa alpina</i> L.                                         |              |          |                                       | DQ786933 | Soreng <i>et al.</i> (Unpublished) |
| <i>Poa pratensis</i> L.                                      |              |          |                                       | AF164402 | Hilu <i>et al.</i> 1999            |
| <i>Poa trivialis</i> L.                                      |              | AY395555 | Silvertown <i>et al.</i> 2006         | HM850517 | Schaefer <i>et al.</i> 2011        |
| <i>Sesleria caerulea</i> (L.) Ard.                           |              | EF125156 | Bouchenak-Khelladi <i>et al.</i> 2009 | DQ786942 | Soreng <i>et al.</i> (Unpublished) |
| <i>Trisetum flavescens</i> (L.) P. Beauv.                    |              | AY395565 | Silvertown <i>et al.</i> 2006         |          |                                    |
| <i>Polygala chamaebuxus</i> L.                               | Polygalaceae | AM234197 | Forest <i>et al.</i> 2007             | EU596517 | Bello <i>et al.</i> 2009           |
| <i>Polygala vulgaris</i> L.                                  |              | AM234193 | Forest <i>et al.</i> 2007             | EU604046 | Bello <i>et al.</i> 2009           |
| <i>Polygonum bistorta</i> L.                                 | Polygonaceae | FM883607 | Galasso (Unpublished)                 | AF204859 | Meimberg <i>et al.</i> 2000        |
| <i>Rumex acetosa</i> L.                                      |              | AY395559 | Silvertown <i>et al.</i> 2006         | GQ434303 | Chen <i>et al.</i> 2010            |
| <i>Rumex crispus</i> L.                                      |              |          |                                       | EU840458 | Wang & Liu (Unpublished)           |
| <i>Androsace chamaejasme</i> Wulfen ex Host                  | Primulaceae  |          |                                       | DQ378429 | Mast <i>et al.</i> 2006            |
| <i>Lysimachia nummularia</i> L.                              |              | AY395550 | Silvertown <i>et al.</i> 2006         |          |                                    |
| <i>Primula elatior</i> (L.) Hill                             |              |          |                                       | DQ378361 | Mast <i>et al.</i> 2006            |
| <i>Primula farinose</i> L.                                   |              |          |                                       | DQ378345 | Mast <i>et al.</i> 2006            |
| <i>Primula veris</i> L.                                      |              | AF394982 | Trift <i>et al.</i> 2002              | AJ429293 | Bremer <i>et al.</i> 2002          |

|                                               |               |          |                                               |                |                                       |
|-----------------------------------------------|---------------|----------|-----------------------------------------------|----------------|---------------------------------------|
| <i>Soldanella alpina</i> (L.)<br>F.W. Schmidt |               |          |                                               | AY647533       | Mast <i>et al.</i> 2004               |
| <i>Caltha palustris</i> L.                    | Ranunculaceae | EU053906 | Hoot <i>et al.</i> 2007                       | AY515232       | Lee & Heo<br>(Unpublished)            |
| <i>Ranunculus<br/>aconitifolius</i> L.        |               |          |                                               | AY954217       | Paun <i>et al.</i> 2005               |
| <i>Ranunculus alpestris</i> L.                |               |          |                                               | AY954221       | Paun <i>et al.</i> 2005               |
| <i>Ranunculus acris</i> L.                    |               |          |                                               | AY954199       | Paun <i>et al.</i> 2005               |
| <i>Ranunculus montanus</i><br>Willd.          |               |          |                                               | AY954149       | Paun <i>et al.</i> 2005               |
| <i>Ranunculus repens</i> L.                   |               |          |                                               | HM565166       | Emadzade <i>et al.</i><br>2011        |
| <i>Trollius europaeus</i>                     |               |          |                                               | AY515236       | Lee & Heo<br>(Unpublished)            |
| <i>Dryas octopetala</i> L.                    | Rosaceae      |          |                                               | JF317424       | Zhang <i>et al.</i> 2011              |
| <i>Fragaria vesca</i> L.                      |               |          |                                               | AF288102       | Potter <i>et al.</i> 2002             |
| <i>Potentilla erecta</i> (L.)<br>Rausch.      |               |          |                                               | HM850688       | Schaefer <i>et al.</i><br>2011        |
| <i>Sanguisorba minor</i><br>Scop.             |               |          |                                               | AB073694       | Mishima <i>et al.</i><br>2002         |
| <i>Salix herbacea</i> L.                      | Salicaceae    |          |                                               | EU790671       | Hardig <i>et al.</i><br>(Unpublished) |
| <i>Salix reticulata</i> L.                    |               | AJ235793 | Savolainen <i>et al.</i><br>2000              | EU790672       | Hardig <i>et al.</i><br>(Unpublished) |
| <i>Parnassia palustris</i> L.                 | Saxifragaceae | AY935731 | Zhang &<br>Simmons 2006                       | AY935911       | Zhang & Simmons<br>2006               |
| <i>Saxifraga oppositifolia</i><br>L.          |               | SOU06217 | Soltis <i>et al.</i> 1993                     | SAXCPMA<br>TKD | Johnson & Soltis<br>1995              |
| <i>Rhinanthus minor</i> L.                    |               | AY395558 | Silvertown <i>et al.</i><br>2006              |                |                                       |
| <i>Valeriana montana</i> L.                   | Valerianaceae | AY362494 | Bell 2004                                     | AY362536       | Bell 2004                             |
| <i>Viola biflora</i> L.                       |               |          |                                               | DQ842607       | Yoo & Jang<br>(Unpublished)           |
| <b>Outgroup species</b>                       |               |          |                                               |                |                                       |
| <i>Abies alba</i> Mill.                       | Pinaceae      | AB029652 | Suyama <i>et al.</i><br>2001<br>(Unpublished) |                |                                       |
| <i>Picea abies</i> (L.) H.<br>Karst.          | Pinaceae      | AY611034 | Bouille &<br>Bousquet 2005                    |                |                                       |

**Table S2 Table of the 230 phylogenetic tree nodes with the number of descendent species, the number of plots, and the elevation range at each node.**

| Node | No. of species | No. of plots | Elevation range (m) |
|------|----------------|--------------|---------------------|
| 1    | 231            | 693          | 412.3 – 3041.6      |
| 2    | 181            | 690          | 412.3 – 3041.6      |
| 3    | 172            | 690          | 412.3 – 3041.6      |
| 4    | 122            | 677          | 412.3 – 3041.6      |
| 5    | 12             | 559          | 412.3 – 2693.4      |
| 6    | 6              | 432          | 412.3 – 2693.4      |
| 7    | 5              | 392          | 412.3 – 2693.4      |
| 8    | 4              | 262          | 412.3 – 2581.8      |
| 9    | 2              | 230          | 412.3 – 2581.8      |
| 10   | 2              | 40           | 601.3 – 2500.0      |

|    |     |     |                |
|----|-----|-----|----------------|
| 11 | 6   | 341 | 412.3 – 2693.4 |
| 12 | 3   | 238 | 412.3 – 2581.8 |
| 13 | 2   | 59  | 601.3 – 2500.0 |
| 14 | 3   | 132 | 601.3 – 2500.0 |
| 15 | 2   | 111 | 601.3 – 2500.0 |
| 16 | 110 | 662 | 412.3 – 3017.7 |
| 17 | 10  | 305 | 412.3 – 2625.2 |
| 18 | 4   | 83  | 601.3 – 2500.0 |
| 19 | 3   | 82  | 601.3 – 2500.0 |
| 20 | 2   | 55  | 601.3 – 2500.0 |
| 21 | 6   | 279 | 412.3 – 2581.8 |
| 22 | 5   | 269 | 412.3 – 2581.8 |
| 23 | 4   | 257 | 412.3 – 2581.8 |
| 24 | 3   | 134 | 601.3 – 2540.0 |
| 25 | 2   | 127 | 601.3 – 2500.0 |
| 26 | 100 | 662 | 412.3 – 3017.7 |
| 27 | 40  | 623 | 412.3 – 2693.4 |
| 28 | 11  | 396 | 412.3 – 2693.4 |
| 29 | 5   | 306 | 412.3 – 2625.2 |
| 30 | 2   | 68  | 601.3 – 2500.0 |
| 31 | 3   | 258 | 412.3 – 2581.8 |
| 32 | 2   | 188 | 601.3 – 2581.8 |
| 33 | 6   | 208 | 412.3 – 2581.8 |
| 34 | 5   | 176 | 601.3 – 2581.8 |
| 35 | 4   | 163 | 601.3 – 2581.8 |
| 36 | 2   | 59  | 601.3 – 2500.0 |
| 37 | 2   | 113 | 601.3 – 2500.0 |
| 38 | 29  | 586 | 412.3 – 2693.4 |
| 39 | 27  | 583 | 412.3 – 2693.4 |
| 40 | 14  | 436 | 412.3 – 2693.4 |
| 41 | 4   | 183 | 601.3 – 2581.8 |
| 42 | 3   | 166 | 601.3 – 2581.8 |
| 43 | 2   | 86  | 601.3 – 2500.0 |
| 44 | 10  | 366 | 412.3 – 2693.4 |
| 45 | 8   | 335 | 412.3 – 2625.2 |
| 46 | 2   | 253 | 412.3 – 2581.8 |
| 47 | 6   | 139 | 601.3 – 2540.0 |
| 48 | 5   | 107 | 601.3 – 2500.0 |
| 49 | 4   | 103 | 601.3 – 2500.0 |
| 50 | 3   | 94  | 601.3 – 2500.0 |
| 51 | 2   | 78  | 601.3 – 2500.0 |
| 52 | 2   | 134 | 601.3 – 2540.0 |
| 53 | 13  | 507 | 412.3 – 2693.4 |
| 54 | 11  | 482 | 412.3 – 2693.4 |
| 55 | 10  | 468 | 412.3 – 2693.4 |
| 56 | 5   | 392 | 412.3 – 2693.4 |
| 57 | 3   | 240 | 412.3 – 2581.8 |
| 58 | 2   | 124 | 601.3 – 2500.0 |
| 59 | 2   | 326 | 412.3 – 2625.2 |

|     |    |     |                |
|-----|----|-----|----------------|
| 60  | 5  | 286 | 412.3 – 2581.8 |
| 61  | 3  | 77  | 601.3 – 2500.0 |
| 62  | 2  | 58  | 601.3 – 2500.0 |
| 63  | 2  | 227 | 412.3 – 2581.8 |
| 64  | 2  | 40  | 601.3 – 2500.0 |
| 65  | 2  | 70  | 601.3 – 2500.0 |
| 66  | 60 | 647 | 412.3 – 2693.4 |
| 67  | 44 | 639 | 412.3 – 2693.4 |
| 68  | 37 | 618 | 412.3 – 2693.4 |
| 69  | 36 | 617 | 412.3 – 2693.4 |
| 70  | 21 | 564 | 412.3 – 2693.4 |
| 71  | 16 | 473 | 412.3 – 2693.4 |
| 72  | 13 | 462 | 412.3 – 2693.4 |
| 73  | 3  | 326 | 412.3 – 2625.2 |
| 74  | 2  | 265 | 412.3 – 2581.8 |
| 75  | 10 | 278 | 412.3 – 2581.8 |
| 76  | 6  | 167 | 601.3 – 2581.8 |
| 77  | 3  | 89  | 601.3 – 2500.0 |
| 78  | 2  | 48  | 601.3 – 2500.0 |
| 79  | 3  | 91  | 601.3 – 2500.0 |
| 80  | 2  | 54  | 601.3 – 2500.0 |
| 81  | 4  | 152 | 601.3 – 2581.8 |
| 82  | 3  | 76  | 601.3 – 2500.0 |
| 83  | 2  | 61  | 601.3 – 2500.0 |
| 84  | 3  | 111 | 601.3 – 2500.0 |
| 85  | 2  | 77  | 601.3 – 2500.0 |
| 86  | 5  | 377 | 412.3 – 2693.4 |
| 87  | 3  | 138 | 601.3 – 2540.0 |
| 88  | 2  | 93  | 601.3 – 2500.0 |
| 89  | 2  | 328 | 412.3 – 2625.2 |
| 90  | 15 | 487 | 412.3 – 2693.4 |
| 91  | 9  | 443 | 412.3 – 2693.4 |
| 92  | 3  | 295 | 412.3 – 2581.8 |
| 93  | 2  | 128 | 601.3 – 2500.0 |
| 94  | 6  | 247 | 412.3 – 2581.8 |
| 95  | 3  | 205 | 412.3 – 2581.8 |
| 96  | 2  | 41  | 601.3 – 2500.0 |
| 97  | 3  | 73  | 601.3 – 2500.0 |
| 98  | 2  | 47  | 601.3 – 2500.0 |
| 99  | 6  | 250 | 412.3 – 2581.8 |
| 100 | 5  | 235 | 412.3 – 2581.8 |
| 101 | 4  | 213 | 412.3 – 2581.8 |
| 102 | 3  | 173 | 601.3 – 2581.8 |
| 103 | 2  | 149 | 601.3 – 2581.8 |
| 104 | 7  | 366 | 412.3 – 2693.4 |
| 105 | 2  | 149 | 601.3 – 2581.8 |
| 106 | 5  | 320 | 412.3 – 2625.2 |
| 107 | 2  | 37  | 601.3 – 2500.0 |
| 108 | 3  | 310 | 412.3 – 2625.2 |

|     |    |     |                |
|-----|----|-----|----------------|
| 109 | 2  | 254 | 412.3 – 2581.8 |
| 110 | 16 | 496 | 412.3 – 2693.4 |
| 111 | 4  | 209 | 412.3 – 2581.8 |
| 112 | 3  | 196 | 424.6 – 2581.8 |
| 113 | 2  | 106 | 601.3 – 2500.0 |
| 114 | 12 | 450 | 412.3 – 2693.4 |
| 115 | 11 | 443 | 412.3 – 2693.4 |
| 116 | 7  | 327 | 412.3 – 2625.2 |
| 117 | 3  | 118 | 601.3 – 2500.0 |
| 118 | 2  | 101 | 601.3 – 2500.0 |
| 119 | 4  | 231 | 412.3 – 2581.8 |
| 120 | 2  | 79  | 601.3 – 2500.0 |
| 121 | 2  | 155 | 601.3 – 2581.8 |
| 122 | 4  | 225 | 412.3 – 2581.8 |
| 123 | 2  | 170 | 601.3 – 2581.8 |
| 124 | 2  | 131 | 601.3 – 2500.0 |
| 125 | 50 | 673 | 412.3 – 3041.6 |
| 126 | 45 | 654 | 412.3 – 2693.4 |
| 127 | 41 | 614 | 412.3 – 2693.4 |
| 128 | 8  | 274 | 412.3 – 2581.8 |
| 129 | 7  | 264 | 412.3 – 2581.8 |
| 130 | 6  | 219 | 412.3 – 2581.8 |
| 131 | 5  | 174 | 601.3 – 2581.8 |
| 132 | 4  | 116 | 601.3 – 2500.0 |
| 133 | 3  | 91  | 601.3 – 2500.0 |
| 134 | 2  | 88  | 601.3 – 2500.0 |
| 135 | 33 | 602 | 412.3 – 2693.4 |
| 136 | 13 | 529 | 412.3 – 2693.4 |
| 137 | 12 | 515 | 412.3 – 2693.4 |
| 138 | 11 | 515 | 412.3 – 2693.4 |
| 139 | 9  | 511 | 412.3 – 2693.4 |
| 140 | 8  | 496 | 412.3 – 2693.4 |
| 141 | 5  | 448 | 412.3 – 2693.4 |
| 142 | 4  | 441 | 412.3 – 2693.4 |
| 143 | 3  | 377 | 412.3 – 2693.4 |
| 144 | 2  | 190 | 601.3 – 2581.8 |
| 145 | 3  | 286 | 412.3 – 2581.8 |
| 146 | 2  | 182 | 601.3 – 2581.8 |
| 147 | 2  | 85  | 601.3 – 2500.0 |
| 148 | 20 | 554 | 412.3 – 2693.4 |
| 149 | 2  | 72  | 601.3 – 2500.0 |
| 150 | 18 | 553 | 412.3 – 2693.4 |
| 151 | 3  | 360 | 412.3 – 2693.4 |
| 152 | 2  | 360 | 412.3 – 2693.4 |
| 153 | 15 | 500 | 412.3 – 2693.4 |
| 154 | 3  | 52  | 601.3 – 2500.0 |
| 155 | 2  | 44  | 601.3 – 2500.0 |
| 156 | 12 | 471 | 412.3 – 2693.4 |
| 157 | 7  | 463 | 412.3 – 2693.4 |

|     |    |     |                |
|-----|----|-----|----------------|
| 158 | 2  | 110 | 601.3 – 2500.0 |
| 159 | 5  | 457 | 412.3 – 2693.4 |
| 160 | 3  | 356 | 412.3 – 2693.4 |
| 161 | 2  | 347 | 412.3 – 2693.4 |
| 162 | 2  | 394 | 412.3 – 2693.4 |
| 163 | 5  | 198 | 424.6 – 2581.8 |
| 164 | 4  | 197 | 424.6 – 2581.8 |
| 165 | 3  | 130 | 601.3 – 2500.0 |
| 166 | 2  | 87  | 601.3 – 2500.0 |
| 167 | 4  | 276 | 412.3 – 2581.8 |
| 168 | 3  | 59  | 601.3 – 2500.0 |
| 169 | 2  | 36  | 601.3 – 2500.0 |
| 170 | 5  | 143 | 601.3 – 2581.8 |
| 171 | 4  | 114 | 601.3 – 2500.0 |
| 172 | 2  | 58  | 601.3 – 2500.0 |
| 173 | 2  | 87  | 601.3 – 2500.0 |
| 174 | 9  | 511 | 412.3 – 2693.4 |
| 175 | 2  | 125 | 601.3 – 2500.0 |
| 176 | 7  | 491 | 412.3 – 2693.4 |
| 177 | 5  | 463 | 412.3 – 2693.4 |
| 178 | 4  | 435 | 412.3 – 2693.4 |
| 179 | 3  | 425 | 412.3 – 2693.4 |
| 180 | 2  | 225 | 412.3 – 2581.8 |
| 181 | 2  | 72  | 601.3 – 2500.0 |
| 182 | 50 | 663 | 412.3 – 3017.7 |
| 183 | 49 | 663 | 412.3 – 3017.7 |
| 184 | 48 | 663 | 412.3 – 3017.7 |
| 185 | 12 | 408 | 412.3 – 2693.4 |
| 186 | 8  | 362 | 412.3 – 2693.4 |
| 187 | 7  | 351 | 412.3 – 2693.4 |
| 188 | 6  | 350 | 412.3 – 2693.4 |
| 189 | 5  | 341 | 412.3 – 2693.4 |
| 190 | 4  | 306 | 412.3 – 2625.2 |
| 191 | 2  | 274 | 412.3 – 2581.8 |
| 192 | 2  | 83  | 601.3 – 2500.0 |
| 193 | 4  | 155 | 601.3 – 2581.8 |
| 194 | 3  | 143 | 601.3 – 2581.8 |
| 195 | 2  | 107 | 601.3 – 2500.0 |
| 196 | 36 | 662 | 412.3 – 3017.7 |
| 197 | 35 | 662 | 412.3 – 3017.7 |
| 198 | 34 | 661 | 412.3 – 3017.7 |
| 199 | 33 | 661 | 412.3 – 3017.7 |
| 200 | 29 | 661 | 412.3 – 3017.7 |
| 201 | 17 | 643 | 412.3 – 2693.4 |
| 202 | 9  | 578 | 412.3 – 2693.4 |
| 203 | 5  | 522 | 412.3 – 2693.4 |
| 204 | 3  | 262 | 412.3 – 2581.8 |
| 205 | 2  | 147 | 601.3 – 2581.8 |
| 206 | 2  | 342 | 412.3 – 2693.4 |

|     |    |     |                |
|-----|----|-----|----------------|
| 207 | 4  | 460 | 412.3 – 2693.4 |
| 208 | 3  | 456 | 412.3 – 2693.4 |
| 209 | 2  | 439 | 412.3 – 2693.4 |
| 210 | 8  | 421 | 412.3 – 2693.4 |
| 211 | 4  | 177 | 601.3 – 2581.8 |
| 212 | 3  | 163 | 601.3 – 2581.8 |
| 213 | 2  | 156 | 601.3 – 2581.8 |
| 214 | 4  | 293 | 412.3 – 2581.8 |
| 215 | 2  | 188 | 601.3 – 2581.8 |
| 216 | 2  | 176 | 601.3 – 2581.8 |
| 217 | 12 | 589 | 412.3 – 2693.4 |
| 218 | 11 | 558 | 412.3 – 2693.4 |
| 219 | 8  | 451 | 412.3 – 2693.4 |
| 220 | 3  | 162 | 601.3 – 2581.8 |
| 221 | 2  | 136 | 601.3 – 2540.0 |
| 222 | 5  | 347 | 412.3 – 2693.4 |
| 223 | 4  | 310 | 412.3 – 2625.2 |
| 224 | 3  | 294 | 412.3 – 2581.8 |
| 225 | 2  | 48  | 601.3 – 2500.0 |
| 226 | 3  | 267 | 412.3 – 2581.8 |
| 227 | 2  | 173 | 601.3 – 2581.8 |
| 228 | 4  | 164 | 601.3 – 2581.8 |
| 229 | 3  | 111 | 601.3 – 2500.0 |
| 230 | 2  | 99  | 601.3 – 2500.0 |

---
